# Supplementary material for: Effects of different proportions of organic substitution for mineral fertilizers on soil methanogenic and methanotrophic communities in paddy fields
Source: PeerJ. 2025 Mar 26;13:e19000. doi: 10.7717/peerj.19000 (PMC11954458; doi:10.7717/peerj.19000)
Supplement: Data S1 [file peerj-13-19000-s002.xlsx]

## Sheet: Raw data of Figure 1
Annual grain production				Annual straw production
CK	1	4295.83		CK	1	5437.02
	2	5210.45			2	5464.6
	3	6285.27			3	5521.56
	4	6791.62			4	5703.21
	5	6746.49			5	5734.31
	6	6786.76			6	5717.8
	7	7202.14			7	5743.81
	8	7102.01			8	5736.46
	9	7242.32			9	5760.99
NPK	1	9550.49		NPK	1	11393.5
	2	9855.3			2	11321.4
	3	9765.68			3	11285.4
	4	10071.3			4	11042.2
	5	10166.4			5	11060.1
	6	10251.2			6	11083.1
	7	10605.6			7	10364.3
	8	10648.5			8	10288.9
	9	10517.9			9	10207.2
M30	1	11010		M30	1	11531.3
	2	11210.1			2	11493.6
	3	11276.1			3	11432.3
	4	11525.5			4	10945.6
	5	11495.4			5	10901.4
	6	11540.6			6	10915.1
	7	12765.8			7	10346.4
	8	12897.8			8	10350.2
	9	12790.9			9	10164.5
M50	1	10628.1		M50	1	11826.8
	2	10662.9			2	11701.6
	3	10854.9			3	11790.9
	4	11896.4			4	10941
	5	11847.9			5	10892.8
	6	11867.9			6	10998.8
	7	12663.5			7	10745.6
	8	12613.4			8	10561.9
	9	12631.7			9	10495.5
M70	1	10539.1		M70	1	11722.9
	2	10641.9			2	11500.8
	3	10870.6			3	11581.6
	4	11525.6			4	11261.4
	5	11456.5			5	11312.5
	6	11496.9			6	11414.4
	7	13428.3			7	10985.9
	8	13267.5			8	10702.1
	9	13619.7			9	10824.6

## Sheet: Raw data of Figure 2
CH4 emission flux																												Total CH4 emission
Date of incubation		2024-03-02	2024-03-03	2024-03-04	2024-03-05	2024-03-06	2024-03-07	2024-03-08	2024-03-12	2024-03-16	2024-03-19	2024-03-20	2024-03-21	2024-03-22	2024-03-24	2024-03-28	2024-03-30	2024-04-01	2024-04-02	2024-04-03	2024-04-04	2024-04-06						Date of incubation		2024-04-06
Number of days of incubation		1	2	3	4	5	6	7	11	15	18	19	20	21	23	27	29	31	32	33	34	36						Number of days of incubation		36
CK	1	0.0620608	0.0608693	0.0597297	0.0629415	0.0792596	0.0824197	0.0929876	0.124847	0.092625	0.180536	0.154427	0.167999	0.14417	0.188721	0.108011	0.0742347	0.110497	0.103245	0.0793633	0.086823	0.0894132						CK	1	4.27046
	2	0.0610766	0.0749081	0.0772911	0.0787416	0.0970283	0.10138	0.139248	0.135518	0.142305	0.167792	0.251092	0.230216	0.222393	0.274508	0.227988	0.155722	0.148987	0.1436	0.114849	0.136036	0.108425							2	6.27433
	3	0.0594706	0.0751672	0.0793633	0.0874964	0.107855	0.0866676	0.147537	0.104125	0.118734	0.195663	0.22317	0.237416	0.182453	0.233945	0.251041	0.133291	0.133705	0.151888	0.144273	0.143444	0.12179							3	6.05246
	4	0.0602477	0.0790006	0.0808138	0.111637	0.106612	0.092107	0.151267	0.127333	0.119874	0.159245	0.180432	0.215918	0.192192	0.220684	0.355736	0.155256	0.138057	0.161576	0.130597	0.143134	0.129302							4	6.36867
	5	0.0601441	0.0825233	0.0911227	0.0830413	0.0921588	0.0941273	0.108995	0.109099	0.108322	0.13614	0.183333	0.196958	0.202293	0.21281	0.124277	0.117491	0.159918	0.121272	0.103452	0.14189	0.126556							5	5.23922
	6	0.0626814	0.061478	0.060327	0.0635709	0.0800522	0.0832439	0.0939175	0.126095	0.0935513	0.182341	0.155971	0.169679	0.145611	0.190608	0.109091	0.074977	0.111602	0.104277	0.0801569	0.0876912	0.0903073							6	4.31317
	7	0.0616873	0.0756572	0.078064	0.079529	0.0979986	0.102394	0.140641	0.136874	0.143728	0.16947	0.253603	0.232518	0.224617	0.277253	0.230268	0.157279	0.150477	0.145036	0.115997	0.137397	0.109509							7	6.33708
	8	0.0600653	0.0759188	0.0801569	0.0883714	0.108934	0.0875343	0.149012	0.105167	0.119921	0.197619	0.225402	0.23979	0.184277	0.236285	0.253551	0.134624	0.135042	0.153407	0.145716	0.144879	0.123008							8	6.11298
	9	0.0608502	0.0797906	0.0816219	0.112753	0.107678	0.093028	0.152779	0.128607	0.121072	0.160837	0.182237	0.218077	0.194114	0.222891	0.359293	0.156808	0.139437	0.163191	0.131903	0.144565	0.130595							9	6.43235
NPK	1	0.0865122	0.0984788	0.0974945	0.0804511	0.0911745	0.0793633	0.116196	0.102675	0.110704	0.116608	0.117748	0.133598	0.128677	0.324613	0.307748	0.0850579	0.0990967	0.0730912	0.0743863	0.0881661	0.0875445						NPK	1	5.37206
	2	0.0668268	0.0899312	0.0864604	0.078638	0.0773947	0.0779646	0.0955778	0.135311	0.124484	0.423804	0.286939	0.168928	0.117435	0.496939	0.476939	0.0674964	0.0770283	0.0793595	0.0856277	0.0908599	0.083711							2	7.25981
	3	0.0685363	0.116869	0.112155	0.110031	0.108632	0.0784826	0.104125	0.126971	0.239437	0.656403	0.355993	0.327033	0.225549	0.565993	0.545993	0.157894	0.0885805	0.095315	0.0816906	0.100703	0.10091							3	9.5807
	4	0.0735094	0.0891542	0.078638	0.0816944	0.0891542	0.0846472	0.110704	0.112984	0.173232	0.264508	0.208197	0.148466	0.147585	0.418197	0.398197	0.0797221	0.0826231	0.0706565	0.0668748	0.0929839	0.0886841							4	6.51938
	5	0.119252	0.0960958	0.0783272	0.0785862	0.0912263	0.086823	0.0923142	0.102779	0.180795	0.143546	0.138884	0.162245	0.153957	0.348884	0.328884	0.0713817	0.0918442	0.0781162	0.0663049	0.0773909	0.0777536							5	5.79836
	6	0.0873773	0.0994636	0.0984695	0.0812556	0.0920862	0.0801569	0.117358	0.103702	0.111812	0.117874	0.119025	0.135134	0.130163	0.329025	0.309025	0.0861085	0.100288	0.0740221	0.0753302	0.0892478	0.0886199							6	5.42779
	7	0.067495	0.0908305	0.087325	0.0794244	0.0781687	0.0787442	0.0965336	0.136664	0.125729	0.428142	0.289908	0.170817	0.11881	0.499908	0.479908	0.0683714	0.0779986	0.0803531	0.086684	0.0919685	0.0847481							7	7.32176
	8	0.0692216	0.118038	0.113277	0.111131	0.109719	0.0792674	0.105167	0.128241	0.241831	0.663067	0.359653	0.330503	0.228005	0.56504	0.549653	0.159673	0.0896663	0.0964682	0.0827076	0.10191	0.102119							8	9.6474
	9	0.0742445	0.0900457	0.0794244	0.0825114	0.0900457	0.0854937	0.111812	0.114114	0.174964	0.267253	0.210379	0.15015	0.149261	0.420379	0.400379	0.0807193	0.0836493	0.071563	0.0677435	0.0941137	0.089771							9	6.57393
M30	1	0.0748563	0.0854761	0.120806	0.0879627	0.117025	0.0963031	0.134897	0.213172	0.161058	0.180898	0.171418	0.182401	0.209909	0.312014	0.389875	0.126766	0.125367	0.136453	0.0873278	0.0973278	0.0731411						M30	1	6.64514
	2	0.070453	0.0985306	0.115419	0.211722	0.147796	0.154168	0.144791	0.32657	0.229749	0.297871	0.21224	0.221409	0.192503	0.277668	0.278289	0.307042	0.182454	0.126247	0.0739625	0.0839625	0.0897183							2	7.18162
	3	0.0664123	0.0958368	0.109668	0.0999293	0.152665	0.152096	0.114383	0.171004	0.274249	0.269949	0.226434	0.236069	0.170797	0.475351	0.357601	0.275546	0.157226	0.120756	0.0781586	0.0881586	0.0964528							3	7.86799
	4	0.0615428	0.0773947	0.130597	0.144843	0.178257	0.298648	0.195611	0.135259	0.209909	0.214312	0.244772	0.251766	0.211618	1.01561	0.684586	0.462143	0.185459	0.149093	0.104473	0.124473	0.088216							4	12.0338
	5	0.133084	0.157431	0.147174	0.172869	0.20535	0.360657	0.231044	0.117698	0.125158	0.444424	0.82114	0.187944	0.173853	0.426759	0.699661	0.263993	0.193022	0.186806	0.109289	0.139289	0.113911							5	10.3059
	6	0.0756049	0.0863309	0.122014	0.0888423	0.118195	0.0972661	0.136246	0.215304	0.162668	0.182707	0.173133	0.184225	0.212008	0.315134	0.393773	0.127933	0.12652	0.137717	0.0989011	0.0989011	0.0741726							6	6.72964
	7	0.0711576	0.0995159	0.116573	0.213839	0.149274	0.155709	0.146239	0.329836	0.232047	0.30085	0.214362	0.223623	0.194428	0.280444	0.281072	0.310013	0.184179	0.12741	0.0954021	0.0854021	0.0909155							7	7.28648
	8	0.0670765	0.0967952	0.110765	0.100929	0.154192	0.153617	0.115526	0.172714	0.276991	0.272649	0.228698	0.23843	0.172505	0.480104	0.361177	0.278201	0.158698	0.121864	0.0796401	0.0896401	0.0777173							8	7.90972
	9	0.0621582	0.0781687	0.131903	0.146292	0.180039	0.301635	0.197567	0.136612	0.212008	0.216455	0.24722	0.254284	0.213734	1.02577	0.691432	0.466664	0.187214	0.150484	0.116318	0.126318	0.0893982							9	12.1723
M50	1	0.0700386	0.0896204	0.0927286	0.115885	0.184628	0.194057	0.122101	0.114384	0.202243	0.421788	0.571917	0.811301	0.267311	1.02438	0.477619	0.193646	0.182197	0.188984	0.151322	0.152098	0.133009						M50	1	13.1009
	2	0.0741829	0.102209	0.0896204	0.119874	0.254045	0.247932	0.0901902	0.10563	0.334861	1.03267	0.251355	0.313934	0.324761	0.527987	0.387843	0.183492	0.15816	0.22364	0.140703	0.209962	0.131973							2	10.8304
	3	0.0755298	0.126815	0.118268	0.121169	0.178878	0.204469	0.147796	0.10765	0.273111	0.542749	0.205923	0.166656	0.188569	0.432616	0.173324	0.197479	0.16676	0.208669	0.158109	0.142255	0.1227							3	7.73579
	4	0.0854761	0.10599	0.113398	0.141631	0.199444	0.15769	0.225605	0.121689	0.278758	0.61794	0.208617	0.211259	0.196961	0.533219	0.322726	0.164791	0.149924	0.175307	0.142878	0.164064	0.130004							4	8.94707
	5	0.0782236	0.105317	0.134016	0.110653	0.161524	0.13873	0.341697	0.139924	0.169504	0.562694	0.236384	0.205768	0.161528	0.829287	0.110538	0.160751	0.152462	0.15785	0.18256	0.227472	0.140106							5	9.31672
	6	0.070739	0.0905166	0.0936559	0.117044	0.186475	0.195997	0.123322	0.115428	0.204166	0.425905	0.577436	0.819214	0.269784	1.03942	0.482995	0.195382	0.183819	0.190673	0.152636	0.153519	0.134189							6	13.2496
	7	0.0749247	0.103231	0.0905166	0.121072	0.256586	0.250412	0.0910921	0.106586	0.33811	1.0449	0.253669	0.316873	0.327809	0.533067	0.392321	0.185127	0.159542	0.225677	0.14191	0.211962	0.133142							7	10.9394
	8	0.0762851	0.128084	0.119451	0.122381	0.180667	0.206514	0.149274	0.108626	0.275742	0.548077	0.207783	0.168123	0.190255	0.836743	0.175657	0.199254	0.168227	0.210556	0.15949	0.143577	0.123777							8	9.41084
	9	0.0863309	0.10705	0.114532	0.143048	0.201439	0.159267	0.227861	0.122806	0.281445	0.220019	0.210503	0.213172	0.198731	0.538351	0.326553	0.166239	0.151223	0.176861	0.144107	0.165605	0.131154							9	8.42824
M70	1	0.0727324	0.0943863	0.122101	0.150386	0.163285	0.251818	0.18411	0.134534	0.15422	0.481412	0.282071	0.244254	0.196025	0.258086	0.204519	0.157017	0.126762	0.122462	0.103502	0.209394	0.127437						M70	1	7.1897
	2	0.0897758	0.0844918	0.0850099	0.11863	0.139507	0.123966	0.16831	0.121946	0.162353	0.486437	0.210841	0.192813	0.32082	0.331077	0.211254	0.14417	0.159553	0.128316	0.0908618	0.158989	0.101017							2	7.38107
	3	0.0856315	0.0966139	0.0883253	0.107544	0.141579	0.121635	0.405519	0.138989	0.223896	0.519902	0.219492	0.195818	0.287148	0.590873	0.24964	0.115108	0.121996	0.108164	0.0918461	0.164532	0.112207							3	8.75537
	4	0.0739239	0.125417	0.101691	0.155981	0.198253	0.146138	0.450122	0.13096	0.138368	0.707742	0.243322	0.157017	0.183489	0.364439	0.682823	0.189498	0.110236	0.109563	0.167583	0.253013	0.146294							4	9.80786
	5	0.0749081	0.111792	0.111792	0.15137	0.220632	0.14935	0.207474	0.118786	0.125572	0.361227	0.476957	0.158986	0.139611	0.608693	0.473898	0.13153	0.110754	0.135724	0.159657	0.212554	0.125935							5	9.0786
	6	0.0734597	0.0953302	0.123322	0.15189	0.164918	0.254336	0.185951	0.13588	0.155762	0.486226	0.284892	0.246697	0.197985	0.260667	0.206664	0.158587	0.128129	0.123787	0.104637	0.211288	0.128711							6	7.2617
	7	0.0906736	0.0853367	0.08586	0.119817	0.140902	0.125206	0.169993	0.123165	0.163976	0.491301	0.212949	0.194741	0.324028	0.334388	0.213466	0.145611	0.161249	0.129699	0.0918704	0.160379	0.102027							7	7.45498
	8	0.0864878	0.09758	0.0892085	0.10862	0.142995	0.122851	0.409574	0.140379	0.226135	0.525101	0.221687	0.197776	0.290019	0.596782	0.252237	0.116259	0.123316	0.109346	0.0928645	0.165978	0.113329							8	8.84302
	9	0.0746631	0.126671	0.102708	0.157541	0.200235	0.1476	0.454623	0.132269	0.139751	0.714819	0.245755	0.158587	0.185324	0.368083	0.689751	0.191393	0.111439	0.110759	0.169359	0.255343	0.147757							9	9.90604

## Sheet: Raw data of Figure 3
mcrA gene copy number				pmoA gene copy number
CK	1	257.205		CK	1	490.096
	2	270.165			2	256.559
	3	149.765			3	397.802
	4	270.165			4	248.438
	5	402.414			5	550.214
	6	568.301			6	1271.32
	7	395.049			7	663.399
	8	315.714			8	726.391
	9	241.588			9	621.125
NPK	1	942.622		NPK	1	2381.08
	2	2247.66			2	3206.55
	3	1772.94			3	2758.62
	4	327.86			4	1069.81
	5	505.851			5	1395.59
	6	548.295			6	1607.86
	7	722.111			7	1541.62
	8	722.111			8	1541.62
	9	722.111			9	1541.62
M30	1	4581.58		M30	1	3982.48
	2	3706.35			2	3982.48
	3	3503.8			3	2666.78
	4	3820.63			4	3982.48
	5	2073.65			5	1983.32
	6	2120.95			6	1286.47
	7	2562.97			7	3982.48
	8	2562.97			8	951.959
	9	1755.21			9	5251.92
M50	1	3837.5		M50	1	4055.37
	2	4297.25			2	5127.92
	3	3614.09			3	8486.66
	4	2722.78			4	4927.24
	5	3614.09			5	2390.25
	6	2926.06			6	4764.89
	7	5356.1			7	8486.66
	8	5760.8			8	11038.8
	9	4980.22			9	8486.66
M70	1	5962.46		M70	1	38328.5
	2	5962.46			2	24636.6
	3	6524.97			3	27154.5
	4	5890.35			4	25344.8
	5	6491.9			5	32851.3
	6	4314.75			6	26039.8
	7	5962.46			7	22097.8
	8	4056.83			8	21361
	9	4520.63			9	22234.1
